# Supplementary material for: Colonisation of hospital surfaces from low- and middle-income countries by extended spectrum β-lactamase- and carbapenemase-producing bacteria
Source: Springer Nature journal article supplement (doi:10.1038/s41467-024-46684-z), 2024-03-29
Supplement: MOESM1 [file 41467_2024_46684_MOESM1_ESM.pdf]

| Concomitant ARG carriage                                             | N samples | % samples |
|----------------------------------------------------------------------|-----------|-----------|
| <i>bla</i> <sub>CTX-M-15</sub> and <i>bla</i> <sub>NDM</sub>         | 116       | 1.84      |
| <i>bla</i> <sub>CTX-M-15</sub> and <i>bla</i> <sub>OXA-48-like</sub> | 46        | 0.73      |
| <i>bla</i> <sub>NDM</sub> and <i>bla</i> <sub>OXA-48-like</sub>      | 42        | 0.67      |

Supplementary Table 1. Frequency of samples showing concomitant antimicrobial resistance gene (ARG) carriage.

|                 | N (%) <i>bla</i> <sub>CTX-M-15</sub>                          | N (%) <i>bla</i> <sub>NDM</sub>                         | N (%) <i>bla</i> <sub>KPC</sub> | N (%) <i>bla</i> <sub>OXA-48-like</sub>               | Total HSS collected in each country and hospital site |
|-----------------|---------------------------------------------------------------|---------------------------------------------------------|---------------------------------|-------------------------------------------------------|-------------------------------------------------------|
| <b>B</b>        | 122 (11.9)<br>BC: 60 (14.6)<br>BK: 62 (10.1)                  | 149 (14.6)<br>BC: 43 (10.5)<br>BK: 106 (17.3)           | 0 (0)                           | 7 (0.7)<br>BC: 5 (1.2)<br>BK: 2 (0.3)                 | B: 1,024<br>BC: 410<br>BK: 614                        |
| <b>E (ES)</b>   | ES: 31 (12.3)                                                 | 1 (0.4)                                                 | 0 (0)                           | 4 (1.6)                                               | 253                                                   |
| <b>N</b>        | 267 (17.0)<br>NK: 181 (38.3)<br>NN: 41 (5.9)<br>NW: 45 (11.3) | 55 (3.5)<br>NK: 43 (9.1)<br>NN: 11 (1.6)<br>NW: 1 (0.3) | 0 (0)                           | 12 (0.8)<br>NK: 6 (1.3)<br>NN: 5 (0.7)<br>NW: 1 (0.3) | 1,566<br>NK: 472<br>NN: 695<br>NW: 399                |
| <b>P (PP)</b>   | PP: 162 (15.7)                                                | 118 (11.4)                                              | 0 (0)                           | 32 (3.1)                                              | 1,033                                                 |
| <b>R</b>        | 204 (22.0)<br>RK: 114 (24.4)<br>RU: 90 (19.6)                 | 13 (1.4)<br>RK: 3 (0.6)<br>RU: 10 (2.2)                 | 0 (0)                           | 8 (0.9)<br>RK: 5 (1.1)<br>RU: 5 (0.7)                 | 927<br>RK: 467<br>RU: 460                             |
| <b>SA (ZAT)</b> | ZAT: 53 (3.6)                                                 | 2 (0.1)                                                 | 0 (0)                           | 11 (0.7)                                              | 1,487                                                 |
|                 |                                                               |                                                         |                                 | TOTAL                                                 | 6,290                                                 |

Supplementary Table 2. Prevalence of antimicrobial resistance genes (ARGs) per country and hospital site, over the number of hospital surface swabs (HSS) collected per country and hospital site. The total number of samples collected per country and per hospital site were used as denominators to calculate the prevalence of each ARG per country and per hospital site.

Abbreviations for BARNARDS hospitals detailed in methods section of the paper.

| a) Bacterial species and n of isolates carrying carbapenemases recovered from HSS |     | b) n and % of isolates carrying carbapenemases per surface category |                              |                          |                         |                         |                   |                |            |
|-----------------------------------------------------------------------------------|-----|---------------------------------------------------------------------|------------------------------|--------------------------|-------------------------|-------------------------|-------------------|----------------|------------|
| <i>Achromobacter insolitus</i>                                                    | 1   | Bacterial species                                                   | Surfaces near the sink drain | Mobile medical equipment | Ward furniture/surfaces | Emergency neonatal care | Medical equipment | Patient's zone | NA         |
| <i>Achromobacter spanius</i>                                                      | 1   | <i>Achromobacter insolitus</i>                                      | 0(0%)                        | 0(0%)                    | 0(0%)                   | 0(0%)                   | 0(0%)             | 0(0%)          | 1(100%)    |
| <i>Acinetobacter baumannii</i>                                                    | 13  | <i>Achromobacter spanius</i>                                        | 0(0%)                        | 1(100%)                  | 0(0%)                   | 0(0%)                   | 0(0%)             | 0(0%)          | 0(0%)      |
| <i>Acinetobacter bereziniae</i>                                                   | 1   | <i>Acinetobacter baumannii</i>                                      | 0(0%)                        | 2(15.38%)                | 1(7.69%)                | 4(30.77%)               | 0(0%)             | 3(23.08%)      | 3(23.08%)  |
| <i>Acinetobacter nosocomialis</i>                                                 | 1   | <i>Acinetobacter bereziniae</i>                                     | 1(100%)                      | 0(0%)                    | 0(0%)                   | 0(0%)                   | 0(0%)             | 0(0%)          | 0(0%)      |
| <i>Enterobacter asburiae</i>                                                      | 2   | <i>Acinetobacter nosocomialis</i>                                   | 0(0%)                        | 0(0%)                    | 1(100%)                 | 0(0%)                   | 0(0%)             | 0(0%)          | 0(0%)      |
| <i>Enterobacter cloacae</i>                                                       | 8   | <i>Enterobacter asburiae</i>                                        | 0(0%)                        | 1(50%)                   | 1(50%)                  | 0(0%)                   | 0(0%)             | 0(0%)          | 0(0%)      |
| <i>Enterobacter hormaechei</i>                                                    | 38  | <i>Enterobacter cloacae</i>                                         | 1(12.5%)                     | 0(0%)                    | 0(0%)                   | 1(12.5%)                | 3(37.5%)          | 2(25%)         | 1(12.5%)   |
| <i>Enterobacter ludwigii</i>                                                      | 2   | <i>Enterobacter hormaechei</i>                                      | 4(10.53%)                    | 1(2.63%)                 | 6(15.79%)               | 6(15.79%)               | 5(13.16%)         | 2(5.26%)       | 14(36.84%) |
| <i>Enterobacter roggenkampii</i>                                                  | 3   | <i>Enterobacter ludwigii</i>                                        | 0(0%)                        | 0(0%)                    | 0(0%)                   | 0(0%)                   | 0(0%)             | 0(0%)          | 2(100%)    |
| <i>Escherichia coli</i>                                                           | 3   | <i>Enterobacter roggenkampii</i>                                    | 0(0%)                        | 0(0%)                    | 1(33.33%)               | 0(0%)                   | 0(0%)             | 2(66.67%)      | 0(0%)      |
| <i>Klebsiella michiganensis</i>                                                   | 4   | <i>Escherichia coli</i>                                             | 0(0%)                        | 0(0%)                    | 0(0%)                   | 1(33.33%)               | 1(33.33%)         | 1(33.33%)      | 0(0%)      |
| <i>Klebsiella oxytoca</i>                                                         | 1   | <i>Klebsiella michiganensis</i>                                     | 0(0%)                        | 1(25%)                   | 0(0%)                   | 0(0%)                   | 2(50%)            | 0(0%)          | 1(25%)     |
| <i>Klebsiella pneumoniae</i>                                                      | 46  | <i>Klebsiella oxytoca</i>                                           | 1(100%)                      | 0(0%)                    | 0(0%)                   | 0(0%)                   | 0(0%)             | 0(0%)          | 0(0%)      |
| <i>Klebsiella quasipneumoniae</i>                                                 | 2   | <i>Klebsiella pneumoniae</i>                                        | 1(2.17%)                     | 4(8.7%)                  | 2(4.35%)                | 10(21.74%)              | 8(17.39%)         | 11(23.91%)     | 10(21.74%) |
| <i>Kosakonia cowanii</i>                                                          | 1   | <i>Klebsiella quasipneumoniae</i>                                   | 1(50%)                       | 0(0%)                    | 0(0%)                   | 0(0%)                   | 1(50%)            | 0(0%)          | 0(0%)      |
| <i>Leclercia adecarboxylata</i>                                                   | 11  | <i>Kosakonia cowanii</i>                                            | 0(0%)                        | 0(0%)                    | 0(0%)                   | 0(0%)                   | 0(0%)             | 1(100%)        | 0(0%)      |
| <i>Pseudomonas aeruginosa</i>                                                     | 6   | <i>Leclercia adecarboxylata</i>                                     | 1(9.09%)                     | 2(18.18%)                | 0(0%)                   | 3(27.27%)               | 0(0%)             | 4(36.36%)      | 1(9.09%)   |
| <i>Pseudomonas asiatica</i>                                                       | 1   | <i>Pseudomonas aeruginosa</i>                                       | 1(16.67%)                    | 0(0%)                    | 1(16.67%)               | 0(0%)                   | 1(16.67%)         | 0(0%)          | 3(50%)     |
| <i>Pseudomonas mendocina</i>                                                      | 3   | <i>Pseudomonas asiatica</i>                                         | 0(0%)                        | 0(0%)                    | 1(100%)                 | 0(0%)                   | 0(0%)             | 0(0%)          | 0(0%)      |
| <i>Pseudomonas putida</i>                                                         | 2   | <i>Pseudomonas mendocina</i>                                        | 1(33.33%)                    | 0(0%)                    | 0(0%)                   | 0(0%)                   | 0(0%)             | 0(0%)          | 2(66.67%)  |
| <i>Pseudomonas stutzeri</i>                                                       | 2   | <i>Pseudomonas putida</i>                                           | 0(0%)                        | 0(0%)                    | 0(0%)                   | 0(0%)                   | 0(0%)             | 0(0%)          | 2(100%)    |
| <i>Serratia marcescens</i>                                                        | 12  | <i>Pseudomonas stutzeri</i>                                         | 0(0%)                        | 0(0%)                    | 0(0%)                   | 1(50%)                  | 1(50%)            | 0(0%)          | 0(0%)      |
| <i>Shewanella putrefaciens</i>                                                    | 2   | <i>Serratia marcescens</i>                                          | 4(33.33%)                    | 0(0%)                    | 0(0%)                   | 0(0%)                   | 2(16.67%)         | 0(0%)          | 6(50%)     |
| <i>Shewanella xiamenensis</i>                                                     | 2   | <i>Shewanella putrefaciens</i>                                      | 1(50%)                       | 0(0%)                    | 0(0%)                   | 0(0%)                   | 0(0%)             | 0(0%)          | 1(50%)     |
| <i>Stenotrophomonas acidaminiphila</i>                                            | 1   | <i>Shewanella xiamenensis</i>                                       | 1(50%)                       | 0(0%)                    | 0(0%)                   | 0(0%)                   | 1(50%)            | 0(0%)          | 0(0%)      |
| <i>Stenotrophomonas maltophilia</i>                                               | 3   | <i>Stenotrophomonas acidaminiphila</i>                              | 0(0%)                        | 0(0%)                    | 0(0%)                   | 0(0%)                   | 0(0%)             | 0(0%)          | 1(100%)    |
| Unidentified                                                                      | 3   | <i>Stenotrophomonas maltophilia</i>                                 | 0(0%)                        | 0(0%)                    | 1(33.33%)               | 0(0%)                   | 0(0%)             | 0(0%)          | 2(66.67%)  |
|                                                                                   | 175 | Unidentified                                                        | 0(0%)                        | 1(33.33%)                | 0(0%)                   | 0(0%)                   | 0(0%)             | 0(0%)          | 2(66.67%)  |

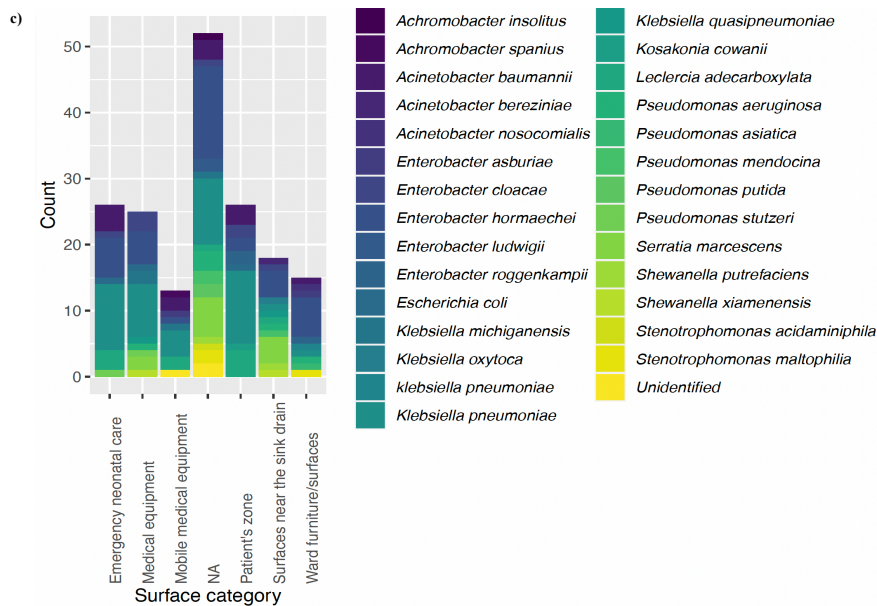

**Supplementary Table 3.** n (%) of bacterial species and isolates per surface category carrying *bla*<sub>NDM</sub> and *bla*<sub>OXA-48</sub>-like according to PCR screening and identification by MALDI-TOF MS. A total of 175 bacterial isolates from 27 bacterial species identified by MALDI-TOF MS (and 3 “unidentified” isolates) were recovered. Abbreviations for BARNARDS hospitals detailed in methods section of the paper.

a) Bacterial species and n of isolates carrying carbapenemases recovered from HSS identified by MALDI-TOF MS. b) Prevalence of the different bacterial species identified carrying carbapenemases is represented per surface category. The percentages shown were calculated by dividing the number of bacterial species isolates found in a specific surface category (n in table b)) by the total of isolates recovered from HSS (a). NA represents those isolates recovered from HSS, which lacked of surface metadata associated. c) Stacked bar chart created with RStudio ggplot2 package to visualise the data from a) and b) (RStudio version 4.3.0 (2023-04-21) -- "Already Tomorrow"). Source data are provided in Tables a) and b) from this Table 3.

a)

| Country                                                              | Dry season                                  | Wet season                                                                                                              |
|----------------------------------------------------------------------|---------------------------------------------|-------------------------------------------------------------------------------------------------------------------------|
| Bangladesh                                                           | December-February (cold temperatures)       | April-September or October (warm temperatures)                                                                          |
| Ethiopia                                                             | October-December (cold temperatures)        | June-September / February-May: less rainfall                                                                            |
| Nigeria                                                              | November-March (March is the hottest month) | April-October / March-October / March-November (August is the coldest month and June is the wettest)                    |
| Pakistan                                                             | December-May (cold and hot temperatures)    | June-November                                                                                                           |
| Rwanda                                                               | June-august / December-February             | March-May / September-November                                                                                          |
| South Africa (majority of the country but differences for Cape Town) | June-August                                 | December-February / November-March: highest rainfall (warm temperatures)<br>Cape Town: May-August rainy season (winter) |

b)

| Time band      | Number of HSS included per month | Number of HSS included per banding | Number of HSS in Bangladesh | Number of HSS in Ethiopia | Number of HSS in Nigeria | Number of HSS in Pakistan | Number of HSS in Rwanda | Number of HSS in South Africa |
|----------------|----------------------------------|------------------------------------|-----------------------------|---------------------------|--------------------------|---------------------------|-------------------------|-------------------------------|
| November 2015  | 37                               | 309                                | 2                           | 0                         | 35                       | 0                         | 0                       | 0                             |
| December 2015  | 72                               |                                    | 27                          | 0                         | 45                       | 0                         | 0                       | 0                             |
| January 2016   | 109                              |                                    | 32                          | 0                         | 45                       | 10                        | 22                      | 0                             |
| February 2016  | 91                               | 693                                | 26                          | 0                         | 45                       | 20                        | 0                       | 0                             |
| March 2016     | 115                              |                                    | 37                          | 0                         | 45                       | 33                        | 0                       | 0                             |
| April 2016     | 146                              |                                    | 29                          | 0                         | 55                       | 40                        | 22                      | 0                             |
| May 2016       | 232                              |                                    | 32                          | 0                         | 70                       | 59                        | 46                      | 25                            |
| June 2016      | 200                              |                                    | 15                          | 0                         | 45                       | 64                        | 23                      | 53                            |
| July 2016      | 276                              | 819                                | 47                          | 0                         | 45                       | 60                        | 46                      | 77                            |
| August 2016    | 198                              |                                    | 64                          | 0                         | 61                       | 55                        | 0                       | 20                            |
| September 2016 | 171                              |                                    | 41                          | 0                         | 44                       | 59                        | 23                      | 3                             |
| October 2016   | 174                              |                                    | 39                          | 0                         | 20                       | 55                        | 23                      | 36                            |
| November 2016  | 191                              | 1014                               | 50                          | 0                         | 35                       | 56                        | 45                      | 5                             |
| December 2016  | 226                              |                                    | 34                          | 0                         | 29                       | 46                        | 66                      | 51                            |
| January 2017   | 254                              |                                    | 30                          | 0                         | 21                       | 55                        | 23                      | 125                           |
| February 2017  | 343                              |                                    | 42                          | 0                         | 25                       | 40                        | 23                      | 213                           |
| March 2017     | 186                              |                                    | 32                          | 0                         | 25                       | 61                        | 68                      | 0                             |
| April 2017     | 142                              | 688                                | 45                          | 0                         | 55                       | 20                        | 22                      | 0                             |
| May 2017       | 156                              |                                    | 62                          | 0                         | 43                       | 5                         | 46                      | 0                             |
| June 2017      | 204                              |                                    | 64                          | 0                         | 57                       | 15                        | 68                      | 0                             |
| July 2017      | 300                              |                                    | 47                          | 0                         | 186                      | 0                         | 68                      | 0                             |
| August 2017    | 143                              | 892                                | 31                          | 42                        | 35                       | 13                        | 22                      | 0                             |
| September 2017 | 229                              |                                    | 48                          | 35                        | 72                       | 5                         | 69                      | 0                             |
| October 2017   | 220                              |                                    | 60                          | 55                        | 34                       | 15                        | 56                      | 0                             |
| November 2017  | 169                              |                                    | 41                          | 45                        | 25                       | 5                         | 53                      | 0                             |
| December 2017  | 68                               | 247                                | 2                           | 61                        | 0                        | 5                         | 0                       | 0                             |
| January 2018   | 10                               |                                    | 0                           | 10                        | 0                        | 0                         | 0                       | 0                             |
| TOTAL          |                                  | 4,662                              | 979                         | 248                       | 1197                     | 796                       | 834                     | 608                           |
|                |                                  |                                    | 4,662                       |                           |                          |                           |                         |                               |

**Supplementary Table 4.** Hospital surface swabs (HSS) collection dates classified into seven time bands, to study the antimicrobial resistance genes (ARGs) prevalence during the study timeline (November 2015 – January 2018).

a) Dry and wet seasons per country (some of them showing information on temperatures) based on the Climate change knowledge portal (World Bank Group). Differences between certain parts of a country exist, thus, the seasons are described for most part of a country. Moreover, dry and wet seasons occur during opposite months, or more than one dry/wet season exist for some countries, and the duration of a season is different in each country. This table was only taken into consideration to establish seven time bands according to the months included per season, but no seasonal analysis per country was performed because of all the mentioned differences between countries. b) Timeline classification into seven time bands and number of HSS collected per country during the study timeline. Information regarding collection dates was available for a total of 4,662 HSS, which were considered for the analysis of ARG prevalence during timeline.

| Country    | Forename        | Surname       | Position            | Affiliation                                                                                               |
|------------|-----------------|---------------|---------------------|-----------------------------------------------------------------------------------------------------------|
| Bangladesh | Samir           | Saha          | PI                  | Chittagong Medical College Hospital, Bangladesh                                                           |
| Bangladesh | Maksuda         | Islam         | scientist           | Chittagong Medical College Hospital, Bangladesh                                                           |
| Bangladesh | Zabed           | Bin-Ahmed     | scientist           | Chittagong Medical College Hospital, Bangladesh                                                           |
| Bangladesh | Wazir           | Ahmed         | clinician           | Chittagong Medical College Hospital, Bangladesh                                                           |
| Bangladesh | Taslima         | Begum         | clinician           | Chittagong Medical College Hospital, Bangladesh                                                           |
| Bangladesh | Mitu            | Chowdhury     | scientist           | Chittagong Medical College Hospital, Bangladesh                                                           |
| Bangladesh | Shaila          | Sharmin       | scientist           | Chittagong Medical College Hospital, Bangladesh                                                           |
| Bangladesh | Chumki          | Rani Dey      | Research nurse      | Chittagong Medical College Hospital, Bangladesh                                                           |
| Bangladesh |                 | Uttam         | scientist           | Chittagong Medical College Hospital, Bangladesh                                                           |
| Bangladesh | Abdul           | Matin         | clinician           | Kumudini Women's Medical College, Bangladesh                                                              |
| Bangladesh | Sowmitra Ranje  | Chakraborty   | scientist           | Kumudini Women's Medical College, Bangladesh                                                              |
| Bangladesh | Sadia           | Tasmin        | clinician           | Kumudini Women's Medical College, Bangladesh                                                              |
| Bangladesh | Dipa            | Rema          | Research nurse      | Kumudini Women's Medical College, Bangladesh                                                              |
| Bangladesh | Rashida         | Khatun        | Research nurse      | Kumudini Women's Medical College, Bangladesh                                                              |
| Bangladesh | Liza            | Nath          | Research nurse      | Kumudini Women's Medical College, Bangladesh                                                              |
| Ethiopia   | Nigatu          | Balkachew     | clinician           | Department of Ob-Gyn, Saint Paul's Hospital Millennium Medical College                                    |
| Ethiopia   | Delayehu        | Bekele        | Co-PI               | Obstetrics and Gynaecology, Saint Paul's Hospital Millennium Medical College                              |
| Ethiopia   | Katherine       | Schaughency   | Data manager        | Saint Paul's Hospital Millennium Medical College                                                          |
| Ethiopia   | Semaria         | Solomon       | laboratory          | Department of Microbiology, Immunology and Parasitology, Saint Paul's Hospital Millennium Medical College |
| Ethiopia   | Zenebe          | Gebreyoannes  | laboratory          | Department of Microbiology, Immunology and Parasitology, Saint Paul's Hospital Millennium Medical College |
| Ethiopia   | Rozina          | Ambachew      | laboratory          | Department of Microbiology, Immunology and Parasitology, Saint Paul's Hospital Millennium Medical College |
| Ethiopia   | Oludare         | Odumade       | clinician           | Department of Pediatrics, Boston Children's Hospital Harvard Medical School                               |
| Ethiopia   | Misgana         | Haleselassie  | nurse               | Saint Paul's Hospital Millennium Medical College                                                          |
| Ethiopia   | Grace           | Chan          | PI                  | Paediatrics, Harvard Medical School                                                                       |
| Ethiopia   | Abigail         | Russo         | Project manager     | Global Health Research Program Manager, Boston Children's Hospital                                        |
| Ethiopia   | Redeat          | Workneh       | Project manager     | Department of Pediatrics and Child Health, Saint Paul's Hospital Millennium Medical College               |
| Ethiopia   | Gesit           | Metaferia     | clinician           | Department of Pediatrics, Saint Paul's Hospital Millennium Medical College                                |
| Ethiopia   | Mahlet          | Abayneh       |                     | Saint Paul's Hospital Millennium Medical College                                                          |
| Ethiopia   | Yahya Zekaria   | Mohammed      |                     | Birhan for Mothers and Children Program, Saint Paul's Hospital Millennium Medical College                 |
| Ethiopia   | Tefera          | Biteye        |                     | Birhan for Mothers and Children Program, Saint Paul's Hospital Millennium Medical College                 |
| Ethiopia   | Alula           | Teklu         | scientist           | Saint Paul's Hospital Millennium Medical College                                                          |
| Ethiopia   | Wendimagegn     | Gezahegn      | clinician           | Department of Pediatrics, Saint Paul's Hospital Millennium Medical College                                |
| India      | Partha Sarathi  | Chakravorty   | clinician           | Obstetrics & Gynecology, IPGMR & SSKM Hospital                                                            |
| India      | Anuradha        | Mukherjee     | clinician           | Division of Bacteriology, ICMR-National Institute of Cholera and Enteric Diseases, Kolkata-700010, India  |
| India      | Ranjan Kumar    | Nandy         | Co-PI               | Scientist-F, Division of Bacteriology, ICMR-National Institute of Cholera and Enteric Diseases            |
| India      | Samarpan        | Roy           | Data entry operator | ICMR-National Institute of Cholera and Enteric Diseases                                                   |
| India      | Anuradha        | Sinha         | Deputy manager      | R&D, Zydzus Cadila                                                                                        |
| India      | Sharmi          | Naha          | laboratory          | ICMR-SRF, Division of Bacteriology, ICMR-National Institute of Cholera and Enteric Diseases               |
| India      | Sukla Saha      | Malakar       | laboratory          | ICMR-National Institute of Cholera and Enteric Diseases                                                   |
| India      | Siddhartha      | Bose          | laboratory          | Medical Laboratory Technologist, Swasthya Bhawan                                                          |
| India      | Monaki          | Majhi         | laboratory          | Baruipur SD Hospital                                                                                      |
| India      | Subhasree       | Sahoo         | nurse               |                                                                                                           |
| India      | Putul           | Mukherjee     | nurse               |                                                                                                           |
| India      | Sumitra Kumar   | Routa         | nurse               |                                                                                                           |
| India      | Chaitali        | Nandi         | nurse               |                                                                                                           |
| India      | Sulagna         | Basu          | PI                  | Scientist F, Division of Bacteriology ICMR-National Institute of Cholera and Enteric Diseases,            |
| India      | Bijan           | Saha          | scientist           | Neonatology, IPGMR & SSKM Hospital                                                                        |
| India      | Pinaki          | Chattopadhyay | scientist           | Neonatal Microbiology, IPGMR & SSKM Hospital                                                              |
| Nigeria    | Fatima Zara Isa | Modibbo       | clinician           | 54gene                                                                                                    |
| Nigeria    | Stella          | Uwaezuoke     | clinician           | Federal Medical Centre Jabi, Abuja, Nigeria                                                               |
| Nigeria    | Dilichukwu      | Meduekwe      | clinician           | Wuse District Hospital, Nigeria                                                                           |
| Nigeria    | Khairiyya       | Muhammad      | laboratory          | National Hospital Abuja, Nigeria                                                                          |
| Nigeria    | Queen           | Nsude         | laboratory          | Wuse District Hospital, Nigeria                                                                           |
| Nigeria    | Ifeoma          | Ukeh          | laboratory          | National Hospital Abuja, Nigeria                                                                          |
| Nigeria    | Mary-Joe        | Okenu         | laboratory          | National Hospital Abuja, Nigeria                                                                          |
| Nigeria    | Akpulu          | Chinenye      | laboratory          | National Hospital Abuja, Nigeria                                                                          |
| Nigeria    | Samuel          | Yakubu        | laboratory          | National Hospital Abuja, Nigeria                                                                          |
| Nigeria    | Vivian          | Asunugwo      | laboratory          | Wuse District Hospital, Nigeria                                                                           |
| Nigeria    | Folake          | Aina          | NYS Corp Member     | National Hospital Abuja, Nigeria                                                                          |
| Nigeria    | Isibong         | Issy          | NYS Corp Member     | National Hospital Abuja, Nigeria                                                                          |
| Nigeria    | Dolapo          | Adekeye       | NYS Corp Member     | National Hospital Abuja, Nigeria                                                                          |
| Nigeria    | Adiele          | Eunice        | nurse               | Wuse District Hospital, Nigeria                                                                           |
| Nigeria    | Abdulmlik       | Amina         | nurse               | Wuse District Hospital, Nigeria                                                                           |
| Nigeria    | R               | Oyewole       | nurse               | National Hospital Abuja, Nigeria                                                                          |
| Nigeria    | I               | Oloton        | nurse               | National Hospital Abuja, Nigeria                                                                          |
| Nigeria    | BC              | Nnaji         | nurse               | National Hospital Abuja, Nigeria                                                                          |
| Nigeria    | M               | Umejiego      | nurse               | National Hospital Abuja, Nigeria                                                                          |
| Nigeria    | PN              | Anoke         | nurse               | National Hospital Abuja, Nigeria                                                                          |
| Nigeria    | S               | Adebayo       | nurse               | National Hospital Abuja, Nigeria                                                                          |
| Nigeria    | GO              | Abegunrin     | nurse               | National Hospital Abuja, Nigeria                                                                          |
| Nigeria    | OB              | Omosho        | nurse               | National Hospital Abuja, Nigeria                                                                          |
| Nigeria    | R               | Ibrahim       | nurse               | National Hospital Abuja, Nigeria                                                                          |
| Nigeria    | B               | Igwe          | nurse               | National Hospital Abuja, Nigeria                                                                          |
| Nigeria    | M               | Abroko        | nurse               | National Hospital Abuja, Nigeria                                                                          |
| Nigeria    | K               | Balami        | nurse               | National Hospital Abuja, Nigeria                                                                          |
| Nigeria    | L               | Bayem         | nurse               | National Hospital Abuja, Nigeria                                                                          |
| Nigeria    | C               | Anyanwu       | nurse               | National Hospital Abuja, Nigeria                                                                          |
| Nigeria    | H               | Haruna        | nurse               | National Hospital Abuja, Nigeria                                                                          |
| Nigeria    | J               | Okike         | nurse               | National Hospital Abuja, Nigeria                                                                          |
| Nigeria    | K               | Goroh         | nurse               | National Hospital Abuja, Nigeria                                                                          |
| Nigeria    | M               | Boi-Sunday    | nurse               | National Hospital Abuja, Nigeria                                                                          |
| Nigeria    | Augusta         | Ugafor        | nurse               | National Hospital Abuja, Nigeria                                                                          |
| Nigeria    | Maryam          | Makama        | nurse               | National Hospital Abuja, Nigeria                                                                          |
| Nigeria    | Kanba           | Ndukwe        | nurse               | National Hospital Abuja, Nigeria                                                                          |
| Nigeria    | Anastasia       | Odama         | nurse               | National Hospital Abuja, Nigeria                                                                          |
| Nigeria    | Hadiza          | Yusuf         | nurse               | National Hospital Abuja, Nigeria                                                                          |
| Nigeria    | Patience        | Wachukwu      | nurse               | National Hospital Abuja, Nigeria                                                                          |
| Nigeria    | Kachalla        | Yahaya        | nurse               | National Hospital Abuja, Nigeria                                                                          |
| Nigeria    | Titus           | Kalade Colson | nurse               | National Hospital Abuja, Nigeria                                                                          |
| Nigeria    | Mercy           | Kura          | nurse               | National Hospital Abuja, Nigeria                                                                          |
| Nigeria    | Damilola        | Orebiyi       | nurse               | National Hospital Abuja, Nigeria                                                                          |
| Nigeria    | Kenneth C.      | Iregbu        | PI                  | National Hospital Abuja, Nigeria                                                                          |
| Nigeria    | Chukwuemeka     | Mmadueke      | clinician           | Wuse District Hospital, Nigeria                                                                           |
| Nigeria    | Lamidi          | Audu          | clinician           | National Hospital Abuja, Nigeria                                                                          |
| Nigeria    | Nura            | Idris         | clinician           | Director Kano State Health Trust Fund                                                                     |
| Nigeria    | Safiya          | Gambo         | clinician           | Murtala Muhammad Specialist Hospital, Nigeria                                                             |
| Nigeria    | Jamila          | Ibrahim       | clinician           | Department of paediatric Muhammad Abdullahi Wase Teaching Hospital                                        |
| Nigeria    | Edwin           | Precious      | scientist           | Department of Microbiology Aminu Kano Teaching Hospital                                                   |
| Nigeria    | Ashiru          | Hassan        |                     | Murtala Muhammad Specialist Hospital, Nigeria                                                             |
| Nigeria    | Shamsudden      | Gwadabe       | scientist           | Department of Physiology NorthWest University Kano                                                        |

|                 |                |                |                       |                                                                                                             |
|-----------------|----------------|----------------|-----------------------|-------------------------------------------------------------------------------------------------------------|
| Nigeria         | Adeola         | Adeleye Falola | scientist             | 54gene                                                                                                      |
| Nigeria         | Muhammad       | Aliyu          | scientist             | Murtala Muhammad Specialist Hospital, Nigeria                                                               |
| Nigeria         | Amina          | Ibrahim        | scientist             | Murtala Muhammad Specialist Hospital, Nigeria                                                               |
| Nigeria         | Aisha Sani     | Mukaddas       | scientist             | Murtala Muhammad Specialist Hospital, Nigeria                                                               |
| Nigeria         | Rashida Yakubu | Khalid         | scientist             | Murtala Muhammad Specialist Hospital, Nigeria                                                               |
| Nigeria         | Fatima Ibrahim | Alkali         | scientist             | Murtala Muhammad Specialist Hospital, Nigeria                                                               |
| Nigeria         | Maryam Yahay   | Muhammad       | scientist             | Murtala Muhammad Specialist Hospital, Nigeria                                                               |
| Nigeria         | Fatima Moham   | Tukur          | scientist             | Murtala Muhammad Specialist Hospital, Nigeria                                                               |
| Nigeria         | Surayya Mustar | Muhammad       | scientist             | Department of Biotechnology Federal University Dutse                                                        |
| Nigeria         | Adcola         | Shittu         | scientist             | Murtala Muhammad Specialist Hospital, Nigeria                                                               |
| Nigeria         | Murjanatu      | Bello          | scientist             | Murtala Muhammad Specialist Hospital, Nigeria                                                               |
| Nigeria         | Muhammad Ab    | Hassan         | scientist             | Murtala Muhammad Specialist Hospital, Nigeria                                                               |
| Nigeria         | Fatima Habib   | Sa ad          | scientist             | Murtala Muhammad Specialist Hospital, Nigeria                                                               |
| Nigeria         | Aishatu        | Kassim         | scientist             | Murtala Muhammad Specialist Hospital, Nigeria                                                               |
| Pakistan        | Haider         | Shirazi        | Co-PI                 | Neonatology Department, Pakistan Institute of Medical Sciences                                              |
| Pakistan        | Adil           | Muhammad       | laboratory            | Department of Microbiology, Quaid-i-Azam University, Islamabad 45320, Pakistan                              |
| Pakistan        | Rabaab         | Zahra          | PI                    | Department of Microbiology, Quaid-i-Azam University, Islamabad 45320, Pakistan                              |
| Pakistan        | Syed Najeeb    | Ullah          | scientist             | Department of Microbiology, Quaid-i-Azam University, Islamabad 45320, Pakistan                              |
| Pakistan        | Muhammad       | Hilal Jan      | project manager       | Department of Microbiology, Quaid-i-Azam University, Islamabad 45320, Pakistan                              |
| Pakistan        | Rubina         | Kamran         | clinician             | Pakistan Institute of Medical Sciences                                                                      |
| Pakistan        |                | Sajana         | research nurse        | Pakistan Institute of Medical Sciences                                                                      |
| Pakistan        | Jazba          | Saeed          | research nurse        | Pakistan Institute of Medical Sciences                                                                      |
| Pakistan        | Noreen         | Maqsood        | research nurse        | Pakistan Institute of Medical Sciences                                                                      |
| Pakistan        | Maria          | Zafar          | research nurse        | Pakistan Institute of Medical Sciences                                                                      |
| Pakistan        | Saraceen       | Sadiq          | research nurse        | Pakistan Institute of Medical Sciences                                                                      |
| Pakistan        | Sumble         | Ahsan          | research nurse        | Pakistan Institute of Medical Sciences                                                                      |
| Pakistan        | Madiha         | Tariq          | scientist             | Pakistan Institute of Medical Sciences                                                                      |
| Pakistan        | Sidra          | Sajid          | scientist             | Pakistan Institute of Medical Sciences                                                                      |
| Pakistan        | Hasma          | Mustafa        | scientist             | Pakistan Institute of Medical Sciences                                                                      |
| Pakistan        | Anees-ur       | Rehman         | local project manager | Pakistan Institute of Medical Sciences                                                                      |
| Pakistan        | Atif           | Muhammad       | local project manager | Pakistan Institute of Medical Sciences                                                                      |
| Pakistan        | Gahssan        | Mehmood        | local project manager | Pakistan Institute of Medical Sciences                                                                      |
| Pakistan        | Mahnoor        | Nisar          | local project manager | Pakistan Institute of Medical Sciences                                                                      |
| Pakistan        | Shermeen       | Akif           | local project manager | Pakistan Institute of Medical Sciences                                                                      |
| Pakistan        | Tahira         | Yasmeen        | local project manager | Pakistan Institute of Medical Sciences                                                                      |
| Pakistan        | Sabir          | Nawaz          | community coordinator | Pakistan Institute of Medical Sciences                                                                      |
| Pakistan        | Anam Shanal    | Atta           | community coordinator | Pakistan Institute of Medical Sciences                                                                      |
| Pakistan        | Mian           | Laiq-ur-Rehman | community coordinator | Pakistan Institute of Medical Sciences                                                                      |
| Pakistan        | Robina         | Kousar         | community nurse       | Pakistan Institute of Medical Sciences                                                                      |
| Pakistan        | Kalsoom        | Bibi           | community nurse       | Pakistan Institute of Medical Sciences                                                                      |
| Pakistan        | Kosar          | Waheed         | community nurse       | Pakistan Institute of Medical Sciences                                                                      |
| Pakistan        | Zainab         | Majeed         | community nurse       | Pakistan Institute of Medical Sciences                                                                      |
| Pakistan        | Ayesha         | Jalil          | data support          | Pakistan Institute of Medical Sciences                                                                      |
| Rwanda          | Espoir         | Kajibwami      | clinician             | Kabgayi Hospital, Kabgayi, Gitarama, Rwanda                                                                 |
| Rwanda          | Aniceth        | Rucogoza       | laboratory            | Microbiology Laboratory Director, National Reference Laboratory Rwanda.                                     |
| Rwanda          | Innocent       | Nzabahimana    | laboratory            | The University Teaching Hospital (CHUK), Kigali, Rwanda                                                     |
| Rwanda          | Mazarati       | Jean-Baptiste  | PI                    | Head of Biomedical Services National Reference Laboratory, Kigali Rwanda                                    |
| Rwanda          | Lucie          | Gaju           | project manager       | The University Teaching Hospital (CHUK), Rwanda                                                             |
| Rwanda          | Kankundiye     | Riziki         | nurse/scientist       | The University Teaching Hospital (CHUK), Kigali, Rwanda                                                     |
| Rwanda          | Brigitte       | Uwamahoro      | nurse/scientist       | The University Teaching Hospital (CHUK), Kigali, Rwanda                                                     |
| Rwanda          | Rachel         | Uwera          | nurse/scientist       | The University Teaching Hospital (CHUK), Kigali, Rwanda                                                     |
| Rwanda          | Eugenie        | Nyiratuza      | nurse/scientist       | The University Teaching Hospital (CHUK), Kigali, Rwanda                                                     |
| Rwanda          | Kumwami        | Muzungu        | nurse/scientist       | The University Teaching Hospital (CHUK), Kigali, Rwanda                                                     |
| Rwanda          | Violette       | Uwitonze       | nurse/scientist       | Kabgayi Hospital, Kabgayi, Gitarama, Rwanda                                                                 |
| Rwanda          | Marie C        | Horanimpundura | nurse/scientist       | Kabgayi Hospital, Kabgayi, Gitarama, Rwanda                                                                 |
| Rwanda          | Francine       | Nzeyimana      | nurse/scientist       | Kabgayi Hospital, Kabgayi, Gitarama, Rwanda                                                                 |
| Rwanda          | Prince         | Mitima         | nurse/scientist       | Kabgayi Hospital, Kabgayi, Gitarama, Rwanda                                                                 |
| South Africa    | Angela         | Dramowski      | clinician             | Department of Paediatrics and child health, Stellenbosch University, Stellenbosch, Cape Town                |
| South Africa    | Andrew         | Whitelaw       | Co-PI                 | Division of Medical Microbiology, Stellenbosch University, Tygerberg Hospital, Cape Town                    |
| South Africa    | Lauren         | Paterson       | laboratory            | Division of Medical Microbiology, Stellenbosch University, Tygerberg Hospital, Cape Town                    |
| South Africa    | Mary           | Frans          | nurse                 | Tygerberg Hospital, Cape Town                                                                               |
| South Africa    | Marvina        | Johnson        | nurse                 | Tygerberg Hospital, Cape Town                                                                               |
| South Africa    | Eveline        | Swanepoel      | nurse                 | Tygerberg Hospital, Cape Town                                                                               |
| South Africa    | Zoleka         | Bojana         | nurse                 | Tygerberg Hospital, Cape Town                                                                               |
| South Africa    | Mieme          | du Preez       | nurse                 | Tygerberg Hospital, Cape Town                                                                               |
| South Africa    | Shaheen        | Mehtar         | PI                    | Faculty of Medicine and Health Sciences, Unit for Infection Prevention and Control, Stellenbosch University |
| South Africa    | Andre          | Bulabula       | scientist             | Faculty of Medicine and Health Sciences, Unit for Infection Prevention and Control, Stellenbosch University |
| The Netherlands | Feiyan         | Liu            | scientist             | Leiden Academic Centre for Drug Research, Leiden University, Leiden, The Netherlands                        |
| The Netherlands | Johan GC       | van Hasselt    | scientist             | Leiden Academic Centre for Drug Research, Leiden University, Leiden, The Netherlands                        |
| UK              | Timothy        | Walsh          | PI                    | Institute of Infection and Immunity, School of Medicine, Cardiff University                                 |
| UK              | Kirsty         | Sands          | scientist             | Institute of Infection and Immunity, School of Medicine, Cardiff University                                 |
| UK              | Maria          | Carvalho       | scientist             | Institute of Infection and Immunity, School of Medicine, Cardiff University                                 |
| UK              | Rebecca        | Milton         | project manager       | Institute of Infection and Immunity, School of Medicine, Cardiff University                                 |
| UK              | Kathryn        | Thomson        | scientist             | Institute of Infection and Immunity, School of Medicine, Cardiff University                                 |
| UK              | Edward         | Portal         | scientist             | Institute of Infection and Immunity, School of Medicine, Cardiff University                                 |
| UK              | Jordan         | Mathias        | scientist             | Institute of Infection and Immunity, School of Medicine, Cardiff University                                 |
| UK              | Calie          | Dyer           | Data manager          | Institute of Infection and Immunity, School of Medicine, Cardiff University                                 |
| UK              | Ana            | Ferreira       | scientist             | Institute of Infection and Immunity, School of Medicine, Cardiff University                                 |
| UK              | Robert         | Andrews        | scientist             | Institute of Infection and Immunity, School of Medicine, Cardiff University                                 |
| UK              | John           | Watkins        | scientist             | Institute of Infection and Immunity, School of Medicine, Cardiff University                                 |
| UK              | David          | Gillespie      | scientist             | Centre for Trials Research, Cardiff University                                                              |
| UK              | Kerry          | Hood           | Co-PI                 | Centre for Trials Research, Cardiff University                                                              |
| UK              | Katie          | Taiyai         | scientist             | Centre for Trials Research, Cardiff University                                                              |
| UK              | Nigel          | Kirby          | scientist             | Centre for Trials Research, Cardiff University                                                              |
| UK              | Maria          | Nieto          | scientist             | Institute of Infection and Immunity, School of Medicine, Cardiff University                                 |
| UK              | Thomas         | Hender         | scientist             | Institute of Infection and Immunity, School of Medicine, Cardiff University                                 |
| UK              | Patrick        | Hogan          | scientist             | Institute of Infection and Immunity, School of Medicine, Cardiff University                                 |
| UK              | Habiba         | Saif           | scientist             | Institute of Infection and Immunity, School of Medicine, Cardiff University                                 |
| UK              | Brekha         | Hassan         | scientist             | Institute of Infection and Immunity, School of Medicine, Cardiff University                                 |
| UK              | Ellis          | Jones          | scientist             | Institute of Infection and Immunity, School of Medicine, Cardiff University                                 |
| UK              | Matthew        | Barrell        | scientist             | Institute of Infection and Immunity, School of Medicine, Cardiff University                                 |
| UK              | Ian            | Boostrom       | scientist             | Institute of Infection and Immunity, School of Medicine, Cardiff University                                 |
| UK              | Francis        | Frayne         | scientist             | Institute of Infection and Immunity, School of Medicine, Cardiff University                                 |
| UK              | Jessica        | Rees           | scientist             | Institute of Infection and Immunity, School of Medicine, Cardiff University                                 |
| UK              | Lim            | Jones          | clinician             | Specialist Antimicrobial Chemotherapy Unit, Public Health Wales, Cardiff, UK                                |
| UK              | Susanna        | Dunachie       | scientist             | Centre for Tropical Medicine and Global Health, Nuffield Department of Medicine, University of Oxford       |
| UK              | Brad           | Spiller        | scientist             | Institute of Infection and Immunity, School of Medicine, Cardiff University                                 |
| UK              | Julian         | Parkhill       | scientist             | Cambridge Infectious Diseases, Department of Veterinary Medicine, Cambridge University                      |

**Supplementary Table 5.** BARNARDS group. List of countries enrolled in BARNARDS study, with individuals who provided help during the research, their forenames, surnames, position, and affiliation.

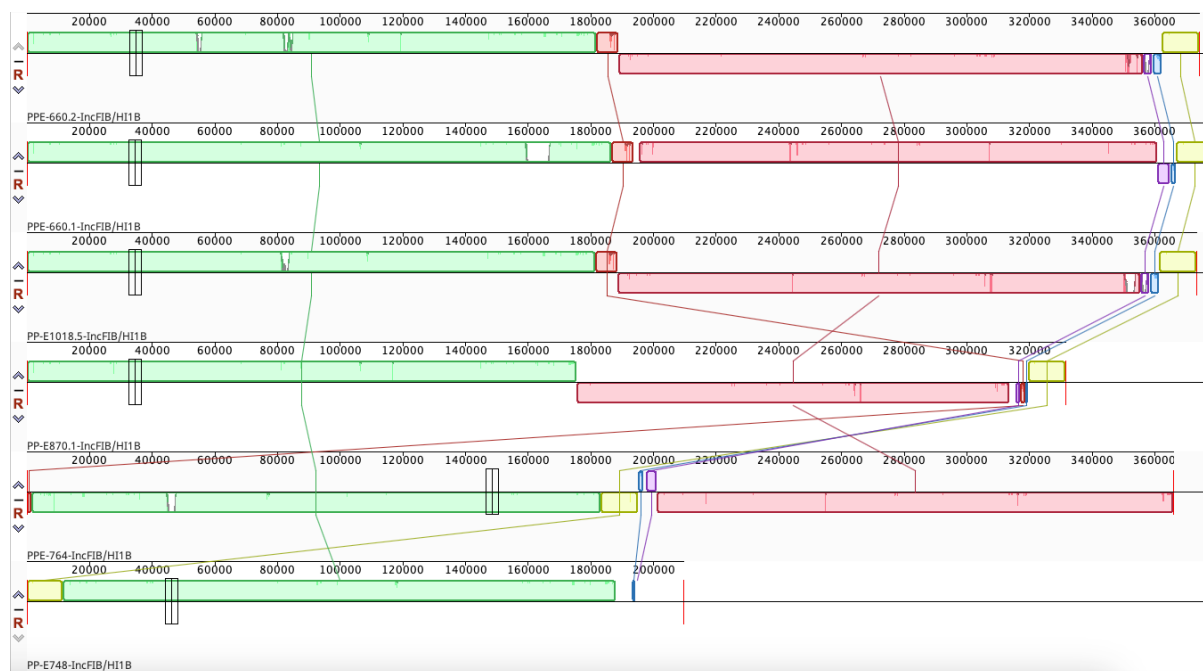

**Supplementary Figure 1.** A Mauve alignment<sup>1</sup> of six IncFIB/HI1B *bla*<sub>NDM-1</sub> plasmid sequences (including partial sequence pPP-E748; bottom) identified in multiple bacterial species sampled from surfaces in the hospital in Pakistan. Plasmids pPPE-660.1 and pPPE-660.2 were isolated from whole genome sequencing data from two bacterial species, a *K. michiganensis* and a *K. pneumoniae* from the same hospital surface sample. This is a particular example of possible plasmid transmission is between *K. pneumoniae*, *K. michiganensis* (sample PP-E660) and *Enterobacter rogenkampii* (pPPE-1018.5, third plasmid sequence in the series). Source data are provided as a Source Data file.

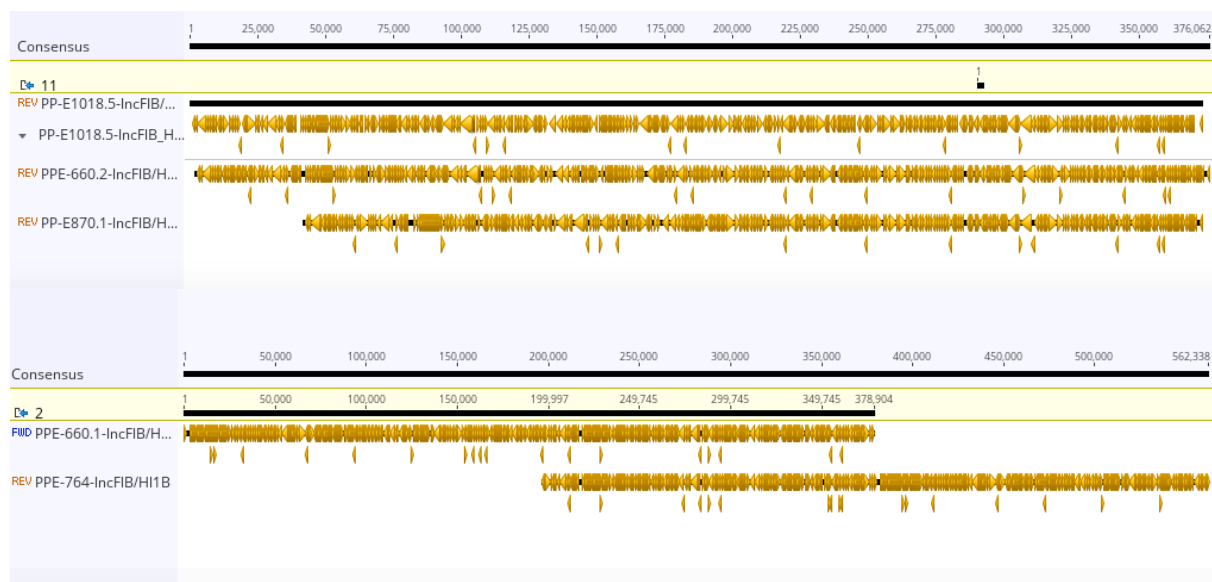

**Supplementary Figure 2.** A sequence alignment of five IncFIB/HI1B *bla*<sub>NDM-1</sub> plasmid sequences. Following a nucleotide alignment of the plasmids using MAFFT within Geneious, pPPE-660.1 and pPPE-660.2 were 70.2% homologous whereas pPP-E660.2 and pPPE-1018.5 were 98.5% homologous. Source data are provided as a Source Data file.

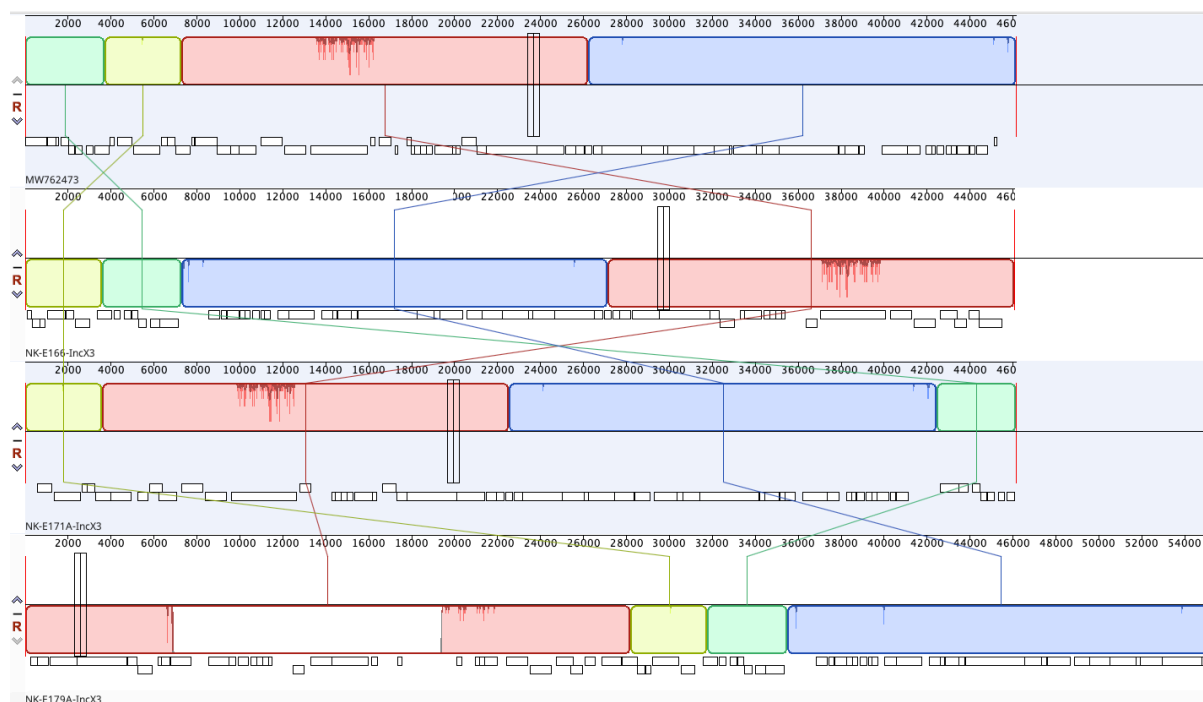

**Supplementary Figure 3.** A Mauve alignment<sup>1</sup> of IncX3  $bla_{NDM-5}$  plasmids from *Enterobacter hormaechei* isolates (singleton STs) cultured from hospital surfaces in Kano, Nigeria. Sequences were mapped to MW762473; a plasmid with  $bla_{NDM}$  originating from an *E. coli* isolate, submitted to NCBI in 2021 in China. All plasmids originated from *E. hormaechei* isolates, one ST114, one ST696 and one ST947. All plasmids contained  $bla_{NDM-5}$ . All plasmids were marked as circular and complete from hybrid genome assembly using Unicycler with two plasmids pNK-E166-IncX3 and pNK-E171A-IncX3 being approximately 46kbp and one (pNK-E179A-IncX3) plasmid was larger at 55kbp. Source data are provided as a Source Data file.

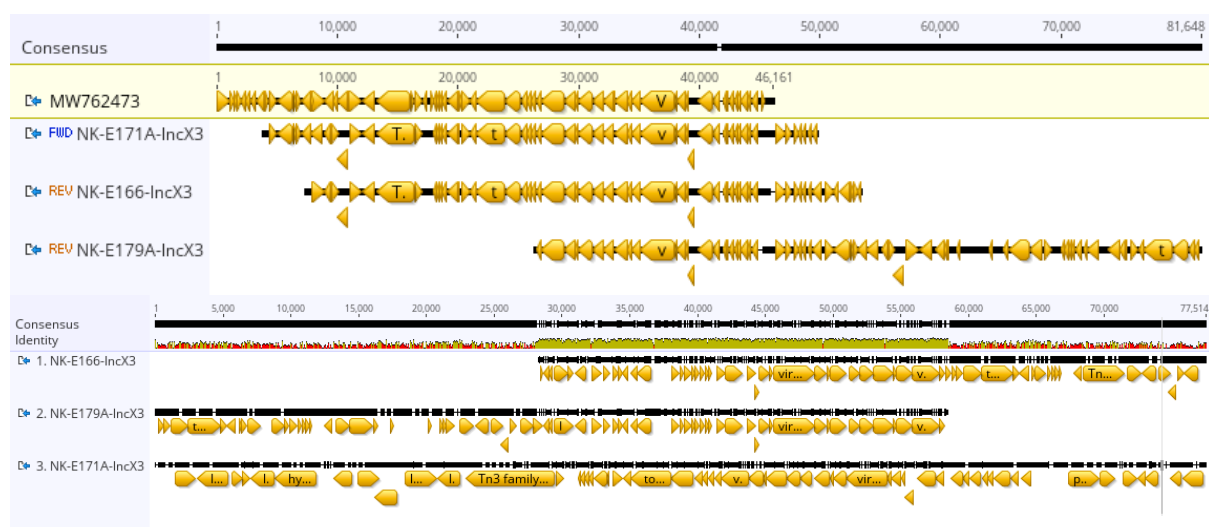

**Supplementary Figure 4.** A sequence alignment of  $bla_{NDM-5}$  IncX3 plasmids from *Enterobacter hormaechei* isolates from Kano, Nigeria. Sequences were mapped to MW762473; a plasmid with  $bla_{NDM}$  originating from an *E. coli* isolate, submitted to NCBI in 2021 in China. All plasmids originated from *E. hormaechei* isolates, one ST114, one ST696 and one ST947. All plasmids contained  $bla_{NDM-5}$ . All plasmids were marked as circular and complete from hybrid genome assembly using Unicycler with two plasmids pNK-E166-IncX3 and pNK-E171A-

IncX3 being approximately 46kbp and one (pNK-E179A-IncX3) plasmid was larger at 55kbp. Source data are provided as a Source Data file.

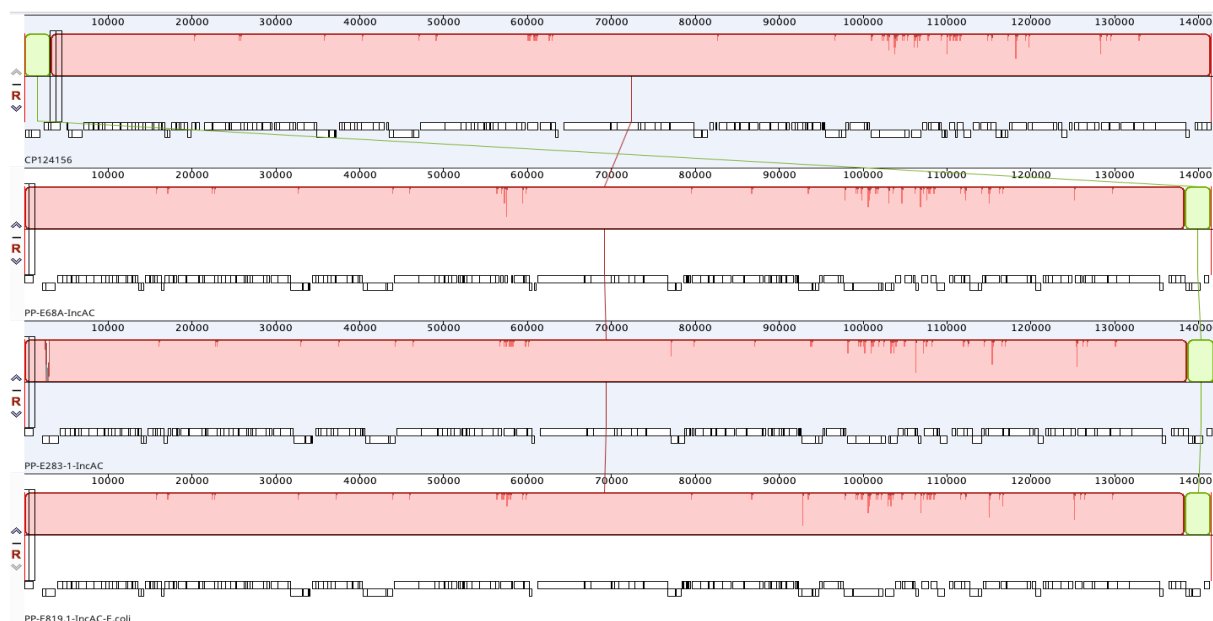

**Supplementary Figure 5.** This figure represents a mauve alignment<sup>1</sup> of IncAC plasmids with *bla*<sub>NDM-1</sub> including PP-E819.1, two plasmids from *Klebsiella* WGS data, and CP124156 which was identified as the most similar (99.99% pairwise identity; 141,528bp). CP124156 relates to an entry from USA in July 2023 and the plasmid originates in a *K. pneumoniae* strain. During analysis, we assembled 11 ColKP3-IncX3 plasmids (~50kb) with *bla*<sub>OXA-181</sub> and 11 larger IncAC plasmids (~140kb) with *bla*<sub>NDM-1</sub> from the same 11 *K. pneumoniae* whole genome sequences. Moreover, an *Escherichia coli* isolate (PP-E819.1) cultured from an emergency neonatal care surface from Pakistan in 02/01/2017 carried both *bla*<sub>NDM-1</sub> and *bla*<sub>OXA-181</sub>. Source data are provided as a Source Data file.

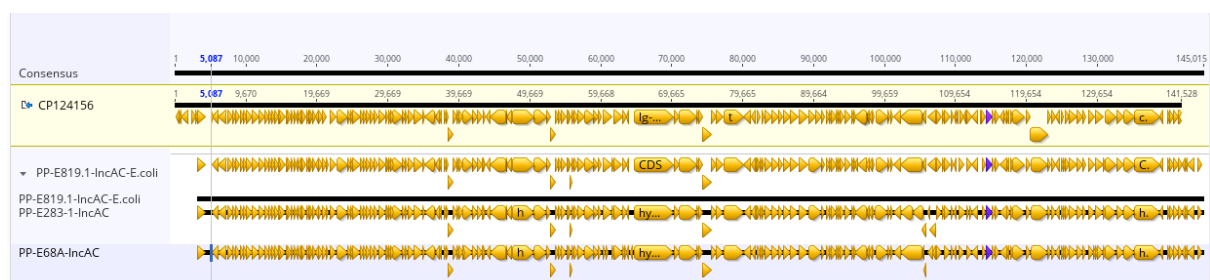

**Supplementary Figure 6.** Sequence alignment of 140kb IncAC plasmids carrying *bla*<sub>NDM-1</sub> evidences the similarity between the plasmid in *E. coli* pPP-E819-IncAC to pPP-E283-IncAC and pPP-E68A-IncAC found in *K. pneumoniae* isolates, indicating the IncAC plasmid carrying *bla*<sub>NDM-1</sub> (blue triangle) may already be widely disseminated. The mash dist metrics<sup>2</sup> between the plasmid from *E. coli* compared to the two plasmids (highest quality assembled and complete plasmids used as representatives from the clonal ST15 strain for comparison analysis) indicates between 982-992/1000 shared hashes. Source data are provided as a Source Data file.



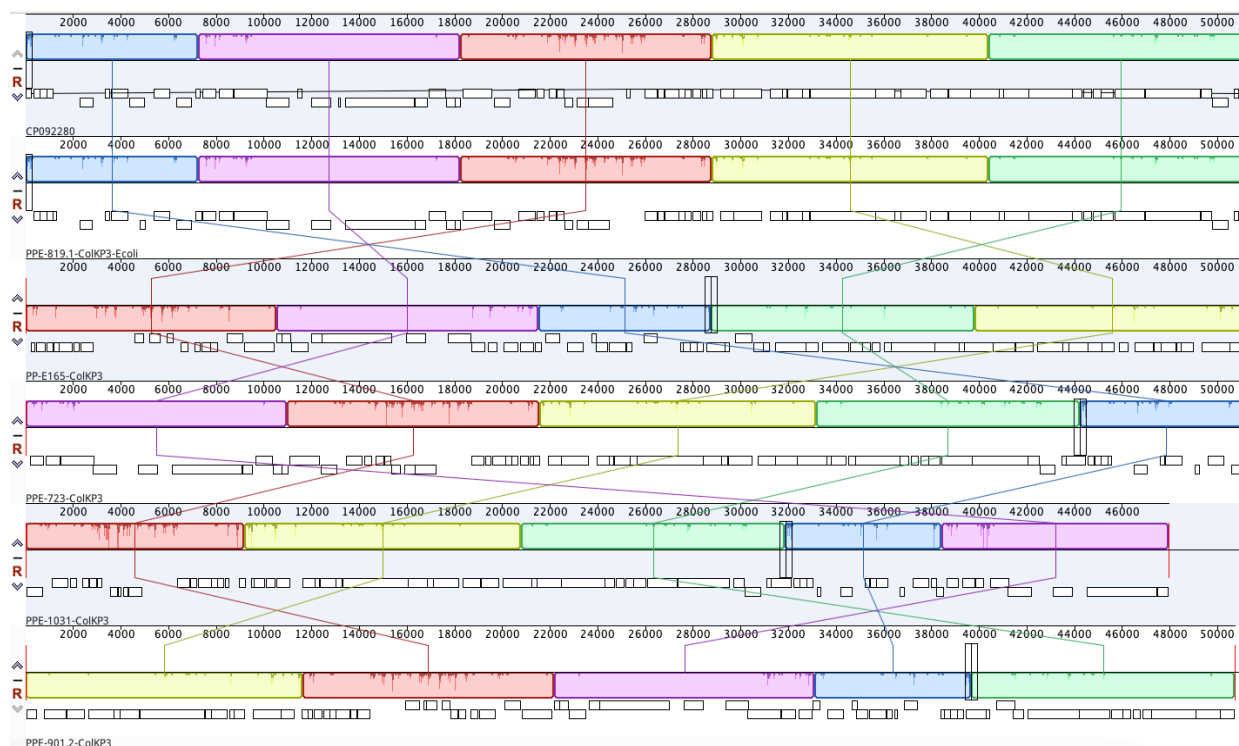

**Supplementary Figure 7.** A mauve alignment<sup>1</sup> of six plasmid sequences including CP092280, pPPE819.1-E. coli and four IncAC plasmids from ST15 *K. pneumoniae* isolates, indicating very similar IncAC plasmids. Analysis of ColKP3-IncX3 plasmids linked to the IncAC plasmids between ST15 *K. pneumoniae* and ST405 *E. coli* in Pakistan, the same single *E. coli* ST405 isolate carrying bla<sub>NDM-1</sub> on a 51,479bp IncAC plasmid. Following comparative analysis, CP092280 was identified as the closest genetic match (to pPPE-819.1) and was submitted to NCBI in 2023 from a group in China Liu, C et al (Unpublished). Following alignment of plasmid assemblies there was some genomic rearrangement within the ColKP3 plasmid assemblies, and varying levels of nucleotide mapping. Plasmids pPPE-819.1-ColKP3-Ecoli, pPPE-723-ColKP3, and pPPE-1031-ColKP3 share the greatest sequence homology when aligned against CP092280. pPPE-723-ColKP3 and pPPE-918.1-ColKP3 share 99.966% nucleotide bases, whereas pPPE-165-ColKP3 and pPPE-918.1-ColKP3 share 43.465% homology. Source data are provided as a Source Data file.

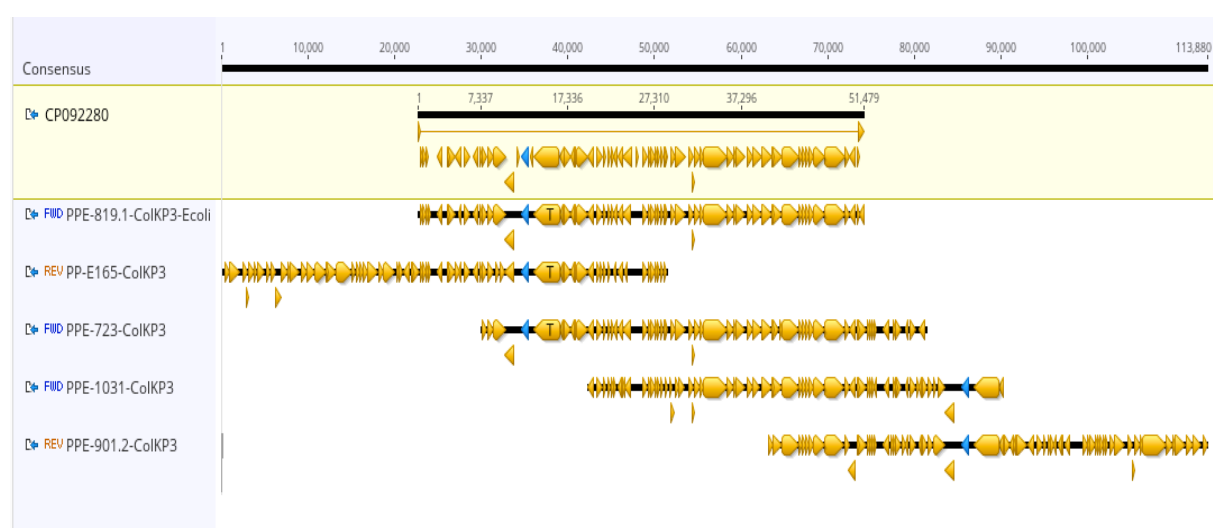

**Supplementary Figure 8.** A plasmid sequence alignment of five ColKP3-IncX3 plasmids including pPPE-819.1-E. coli. All sequences were aligned with CP092280 as the reference plasmid. Source data are provided as a Source Data file.

## Supplementary references

1. Darling, A. C. E., Mau, B., Blattner, F. R. & Perna, N. T. Mauve: Multiple Alignment of Conserved Genomic Sequence With Rearrangements. *Genome Res.* **14 (7)**, 1394–1403, (2004).
2. Ondov, B. D. *et al.* Mash: fast genome and metagenome distance estimation using MinHash. *Genome Biol.* **17 (1)**, 132, (2016).
