# Supplementary material for: Colonisation of hospital surfaces from low- and middle-income countries by extended spectrum β-lactamase- and carbapenemase-producing bacteria
Source: Springer Nature journal article supplement (doi:10.1038/s41467-024-46684-z), 2024-03-29
Supplement: MOESM3 [file 41467_2024_46684_MOESM3_ESM.pdf]

## **Description of Additional Supplementary Files**

**Supplementary Data 1:** Complete dataset.

**Supplementary Data 2:** Positive hospital surface swabs (HSS) for an antimicrobial resistance gene (ARG) out of the total 4,126 among the 309 surfaces collected.

**Supplementary Data 3:** Positive and negative hospital surface swabs (HSS) for an antimicrobial resistance gene (ARG) out of the total 4,126 among the six surface categories per each country and hospital site.

**Supplementary Data 4:** Number of isolates per hospital site carrying carbapenemase antimicrobial resistance genes (ARGs), according to PCR screening and bacterial species identification by MALDI-TOF MS.

**Supplementary Data 5:** Carbapenemase positive Gram-negative bacteria (GNB) isolates (128) out of the 175 total isolates recovered from hospital surface swabs (HSS), identified by MALDI-TOF MS and WGS.

**Supplementary Data 6:** Sequence types (ST) for the most commonly WGS identified species with a recognised multilocus sequence typing (MLST) scheme.

**Supplementary Data 7:** Classification of 309 different type of surfaces collected into six different surface categories.

**Supplementary Data 8:** List of genomes, submitted to NCBI (BioProject number PRJNA971772).
